# Supplementary material for: Screening for Astragalus hamosus Triterpenoid Saponins Using HPTLC Methods: Prior Identification of Azukisaponin Isomers
Source: MDPI journal article supplement (doi:10.3390/molecules27175376), 2022-08-23

**Figure S1** : Four populations of *Astragalus hamosus* collected in Tunisia. Populations of (a) Bizerte, (b) Kairouan, (c) Siliana and (d) Zaghuan.

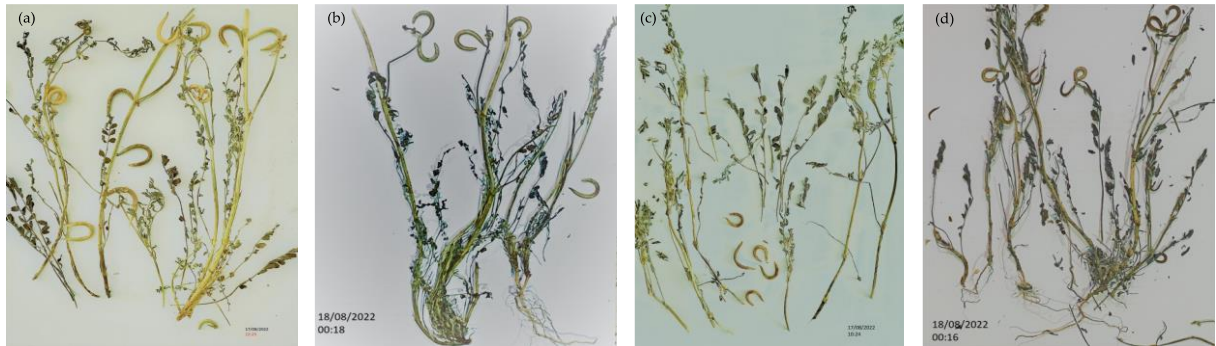

Supplement: s1 [file s1]
